# Supplementary material
Source: PubMed Central journal article supplement (PMC6457222)

## Supplemental Material and Methods

### Flow cytometry

To analyze the cellular composition of blood, spleen, lymph node and bone marrow samples included in this study, the following fluorescently labeled antibodies were used: huCD45-PB, CD3-BV785, CD8-PerCp, CD4-APC-Cy7, BDCA-2-FITC, CD19-PE-Cy7, CD16-BV605, BDCA-1-PE-Cy7, CD16-APC-Cy7, HLA-DR-APC (BioLegend), NKp46-APC, CD123-PE, CD11c-A700, HLA-DR PECE594, (BD Biosciences), CD14-Qdots655 (Invitrogen), BDCA-3-PE (Miltenyi Biotec), CD3-PE-TxRed, CD19-PE-TxRed, CD56-PE-TxRed (Life Technologies). The amine-reactive fluorescent dyes Zombie Aqua Fixable Viability Kit or Zombie NIR Fixable Viability Kit (Biolegend) were used to exclude dead cells. Absolute numbers of different cell subsets were computed from the white blood cell count as measured by a Beckman Coulter A<sup>c</sup>T diff Analyzer. To assess phosphorylation of STAT1 we used pSTAT1-PE (BD Biosciences) according to a previously described protocol <sup>1</sup>. Samples were acquired on a BD LSRFortessa or FACSCanto with the use of FACS Diva software (BD Biosciences) and analysis was performed with FlowJo software.

### RT-qPCR for expression of IFN $\alpha$ subtypes and interferon stimulated genes (ISGs)

RNA was isolated using the RNeasy Micro Kit (QIAGEN) or Quick RNA Microprep (Zymo Research). Purified RNA was reverse transcribed using GoScript Reverse Transcriptase (Promega) following the recommendations of the manufacturer. Quantitative polymerase chain reactions were run on a CFX384 Touch Real-Time PCR Detection System (BIO RAD). A SYBR Green master mix (Applied Biosystems) and the following primers were used:

IFN $\alpha$  1/13 FW 5'-CTT CAA CCT CTT TAC CAC AAA AGA TTC-3'

IFN $\alpha$  1/13 REV 5'-TGC TGG TAG AGT TCG GTG CA-3'

IFN $\alpha$ 2 FW 5'-CTT GAA GGA CAG ACA TGA CTT TGG A-3'

IFN $\alpha$ 2 REV 5'- GGA TGG TTT CAG CCT TTT GGA-3'

IFN $\alpha$ 4 FW 5'-ACT CCT GGA ACA AAT GGG AAG AAT CTC TCA-3'

IFN $\alpha$ 4 REV 5'-GAG CCT TCT GGA ACT GGT GGC CA-3'

IFN $\alpha$ 5 FW 5'- CCC TGG TGG TGC TCA ACT G-3'

IFN $\alpha$ 5 Rev 5'-CTT CCC ATT TGT GCC ATT ATC-3'

IFN $\alpha$ 6 FW 5'-TCC ATG AGG TGA TTC AGC AGA C-3'

IFN $\alpha$ 6 REV 5'-GCT GCT GGT AAA GTT CAG TAT AGA GTT T-3'

IFN $\alpha$ 7 FW 5'-GCC CGG TCC TTT TCT TTA CTG-3'  
IFN $\alpha$ 7 REV 5'-TTC ATG TCT GTC CTT CAA GC-3'  
IFN $\alpha$ 8 FW 5'-CCT TCT AGA TGA ATT CTA CAT CGA ACT TG-3'  
IFN $\alpha$ 8 REV 5'-ACT CTA TCA CCC CCA CTT CCT G-3'  
IFN $\alpha$ 10 FW 5'-TAG GAG GGC CTT GAT ACT CCT GGG-3'  
IFN $\alpha$ 10 REV 5'-TGC CAT CAA ACT CCT CCT GGG GGA T-3'  
IFN $\alpha$ 14 FW 5'-GTG GTG CTC AGC TGC AAG TC-3'  
IFN $\alpha$ 14 REV 5'-GGC TGT GGG TTT GAG ACA GAT T-3'  
IFN $\alpha$ 16 FW 5'-TAT GAT TTC GGA TTC CCC CAG GAG GTG-3'  
IFN $\alpha$ 16 REV 5'-GTC TCA TCC CAA GCA GCA GAT GAA TC-3'  
IFN $\alpha$ 17 FW 5'-CCG TGC TGG TGC TCA GCT A-3'  
IFN $\alpha$ 17 REV 5'-TGT GGG TCT GAG GCA GAT CA-3'  
MXB FW 5'-CAGAGGCAGCGGAATCGTAA-3'  
MXB REV 5'-TGAAGCTCTAGCTCGGTGTTC-3'  
STAT1 FW 5'-GAAATACACCTACGAACATGACCCT-3'  
STAT1 REV 5'-TTCACCAACAGTCTCAACTTCAC-3'  
IFIT3 FW 5'-TCAGAAGTCTAGTCACTTGGGG-3'  
IFIT3 REV 5'-ACACCTTCGCCCTTTCATTTC-3'  
OAS2 FW 5'-ACGTGACATCCTCGATAAAACTG-3'  
OAS2 REV 5'-GAACCCATCAAGGGACTTCTG-3'  
SDHA FW 5'-CAGCATGTGTTACCAAGCTGT-3'  
SDHA REV 5'-GGTGTCGTAGAAATGCCACCT-3'  
GAPDH FW 5'-ATG GGG AAG GTG AAG GTC C-3'  
GAPDH REV 5'-GGG TCA TTG ATG GCA ACA ATA TC-3'

### **Lysate Preparation and Immunoblotting**

Raji cells were stimulated with interferon subtypes as indicated in the figures in RPMI containing 10% FCS for 8 min at 37 °C. After harvesting in ice-cold PBS and centrifugation, the cells were resuspended in ice-cold lysis buffer (10 mM Tris hydrochloride, 150 mM NaCl, 1 mM Na<sub>3</sub>VO<sub>4</sub>, 10 mM NaF, 5 mM EDTA, 1% Triton X-100, cComplete, EDTA-free Protease Inhibitor Cocktail

from Roche) and incubated on ice for 30 min. The cell lysates were centrifuged at 13'000 *g* for 10 min at 4 °C. Protein concentrations were determined using the Pierce BCA Protein Assay Kit (Thermo Scientific) and lysates heated for 5 min at 95 °C in NuPage SDS-PAGE loading buffer (Life Technologies) with 1% β-mercaptoethanol. Equal total protein amounts were loaded on 12.5% SDS-PAGE gels and transferred to PVDF blotting membranes (GE Healthcare life sciences). The proteins of interest were detected using primary antibodies, secondary HRP-coupled antibodies and the Pierce ECL Western Blotting substrate detection system (Thermo Scientific). Densitometric quantification was performed on a Vilber Lourmat Fusion FX imaging system using the ImageJ software.

### **Histology, immunohistochemistry**

Tissue was fixed in 10% saline buffered formalin and paraffin embedded. For immunohistochemistry 3 μm splenic sections were processed on a Leica BOND-MAX system. Stainings were performed with monoclonal mouse anti-EBNA2 (clone PE2, Abcam), mouse anti-CD20 (clone L26, Dako) and rabbit anti-huCD8 (clone SP16, Marque) antibodies. The number of labeled cells was determined per 1mm<sup>2</sup> using the a Vectra3 automated quantitative pathology imaging system (PerkinElmer) using Vectra and InForm software analysis (PerkinElmer) as explained elsewhere <sup>2</sup>.

### **References**

1. Schulz KR, Danna EA, Krutzik PO, Nolan GP. Single-cell phospho-protein analysis by flow cytometry. *Curr Protoc Immunol.* 2012;Chapter 8:Unit 8 17 11-20.
2. Murer A, McHugh D, Caduff N, et al. EBV persistence without its EBNA3A and 3C oncogenes in vivo. *PLoS Pathog.* 2018;14(4):e1007039.

### Supplemental Figure Legends

#### **Figure S1. IFN $\alpha$ production in response to EBNA3 deficient viruses is pDC dependent and EBNA3A and 3C contribute to the low IL12p40 production in response to EBV.**

(A) Total PBMCs or pDC depleted PBMCs were exposed to EBNA3A deficient EBV (3aKO) or EBNA3C deficient EBV (3cKO) virus at the indicated multiplicities of infection (MOI) for 18-24h. The amount of IFN $\alpha$  was measured in the culture supernatants by ELISA. MOI 0.005 n=2, MOI 0.05 n=4 and MOI 0.25 n=2 (B) IL12p40 was measured in the culture supernatants of PBMCs that were exposed to wild-type EBV (wt), EBNA3A deficient EBV (3aKO) or EBNA3C deficient EBV (3cKO) for 18-24h. MOI 0.005 n=3, MOI 0.05 n=3 and MOI 0.25 n=5. (C) IFN $\beta$  levels in PBS (n=4) or EBV treated cultures (MOI 0.5 n=2, MOI 0.25 n=5 and MOI 0.05 n=3) were detected by ELISA. Paired t tests were used. (D) The viability of pDCs 18-24h after EBV infection (MOI 0.25, n=9) was determined by flow cytometry. All single cells were analysed and the percentage viable cells from total pDCs (HLA-DR<sup>+</sup>, CD3CD14CD16CD19CD56<sup>-</sup>, CD11c<sup>-</sup>, BDCA2<sup>+</sup>) are shown.

#### **Figure S2. IFN $\alpha$ subtypes can inhibit EBV entry into Ramos and primary human B cells.**

(A) Ramos cells (EBV only n=7, IFN $\alpha$ 6 n=3, IFN $\alpha$ 14 n=5-7, IFN $\alpha$ 16 n=3, IFN $\alpha$ 17 n=1) or primary B cells (EBV only n=10, IFN $\alpha$ 14 n=7-10) were exposed to EBV and the indicated concentrations of IFN $\alpha$  subtypes for 48h. GFP expression as a measure of EBV entry was determined by flow cytometry and ratios of EBV plus IFN $\alpha$  to EBV only are shown in the graph. Statistical analysis was done on raw data (percentage GFP positive cells) and paired t tests were applied. (B) B cell viability after 48h of culture (IFN $\alpha$ 14 and IFN $\alpha$ 17 n=4, IFN $\alpha$ 6 and IFN $\alpha$ 16 n=3) was determined using an amine-reactive fluorescent dye and is depicted as percentage viable cells, normalized to only EBV infection.

#### **Figure S3. The biological activity of the tested IFN $\alpha$ subtypes was confirmed by STAT1 phosphorylation.**

STAT1 phosphorylation was measured on Raji cells that were exposed to PBS or IFN $\alpha$  subtypes (100ng/ml) by intracellular phospho-protein staining for STAT1 using flow cytometry. One representative histogram and a graph that summarizes two experiments are shown. In

addition, pSTAT1 was detected by Western Blot after stimulation with the IFN $\alpha$  subtypes (50ng/ml). One representative blot is shown.

#### **Figure S4. EBV infection of hu-NSGs**

(A) IL12p40 production remains unchanged after EBNA3A and 3C deficient EBV infection in vivo. IL12p40 serum levels were measured by ELISA after 18h of PBS treatment (n=6) or  $5 \times 10^5$  RGU wild-type EBV (wt, n=6), EBNA3A deficient EBV (3aKO, n=6) or EBNA3C deficient EBV (3cKO, n=8) infection in huNSG mice. IL12p40 serum levels were measured at 72h post infection with  $1 \times 10^5$  RGU or  $5 \times 10^5$  RGU wt EBV (n=3 per group). The presence of IFN $\beta$  in the plasma was assessed after 18h (PBS n=7, EBV n=8). (B) HLA-A2 transgenic (hu-NSG-A2, n=13) and non- transgenic hu-NSGs (hu-NSG, n=19) were infected with  $1 \times 10^5$  RGU EBV and the CD8/CD4 T cell ratio was determined at different time points in the blood and at the termination of the experiment in blood, spleen and bone marrow. Total CD4 $^+$  and CD8 $^+$  T cell numbers were calculated in blood and spleen. (C) Splenic sections were stained for CD20, CD8 and EBNA2 in mice that were treated with PBS (n=4-5), EBV (n=6-7) or EBV plus IFN $\alpha$ 14 administration (n=5). The graphs summarize the quantification of labeled cells per 1mm $^2$ .

#### **Figure S5. DC subset gating in flow cytometry and pDC viability.**

(A) Gating strategy in FloJo for DC subsets as used in Figure 6. (B) In huNSGs that were treated with PBS (n=10) or infected with  $5 \times 10^5$  RGU EBV wt (n=11) or EBNA3A deficient EBV (3aKO, n=6) or EBNA3C deficient EBV (3cKO, n=7) virus for 18h, the viability of pDCs (huCD45 $^+$ , HLA-DR $^+$ , lineage $^-$ , CD11c $^-$ , BDCA2 $^+$ , CD123 $^+$ ) in the blood was determined using an amine-reactive fluorescent dye. A representative FACS plot is shown to the right.

#### **Figure S6**

(A) EBV copy numbers per spleen were correlated (Spearman r) to percentage or total numbers of CD8 $^+$  T cells (n=26), pDCs (n=21) and cDCs (n=21). EBV infected huNSGs were used from 7 independent experiments. (B) A potential linkage of tumor incidence with viral load or the cell percentages and total numbers of CD8 $^+$  T cells, pDCs and cDCs was analysed. No tumor incidence (n=11), tumor incidence (n=6).

**Figure S7. pDC depletion abolishes ISG induction after EBV infection, but does not alter the resulting T cell expansion.**

(A) Flow cytometric gating strategy for DC subsets as used in Figure 7. (B) The effect of  $\alpha$ -CD303 on ISG expression was determined by RT-qPCR of huNSG blood leukocytes 18h post infection with  $5 \times 10^5$  RGU EBV and unpaired t tests were applied. (PBS n=5, EBV+PBS n=6, EBV+ $\alpha$ -CD303 n=6, EBV+isotype n=5). (C) After pretreatment with PBS,  $\alpha$ -CD303 or isotype antibody, the mice were infected with  $1 \times 10^5$  RGU EBV (as schematically depicted in Fig. 7a). The ratio of CD8/CD4 T cells was measured at the endpoint of the experiment (week 5 or 6) in cells processed from blood, bone marrow and lymph nodes. (D) Total numbers of CD8<sup>+</sup> and CD4<sup>+</sup> T cells were determined per ml whole blood and per spleen. For (C) and (D), PBS n=5, PBS+ $\alpha$ -CD303 n=5, EBV+PBS n=8, EBV+ $\alpha$ -CD303 n=7, EBV+isotype n=3. In lymph nodes, T cell activation was measured in terms of HLA-DR upregulation (E), and the percentage of NKp46 expressing NK cells was assessed (F).

**Figure S1**

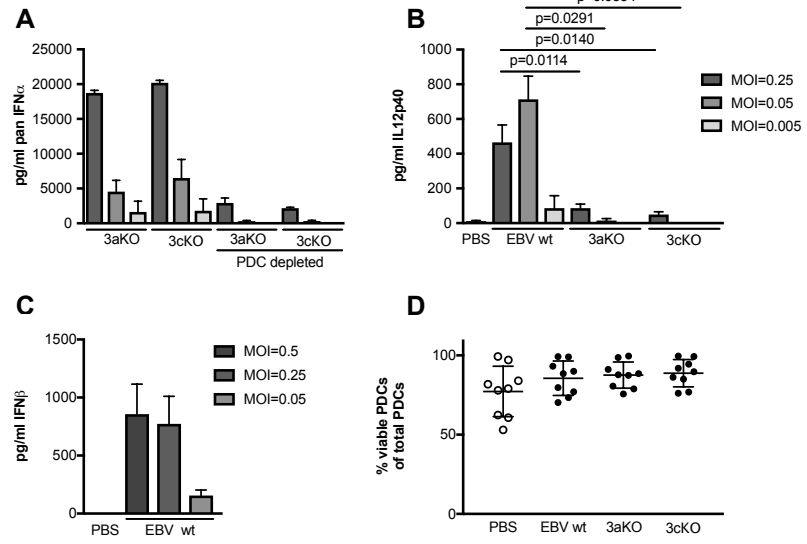

# Figure S2

## A

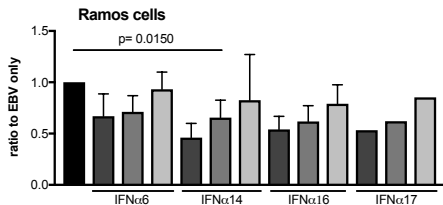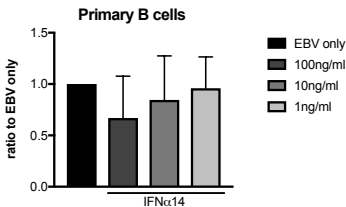

## B

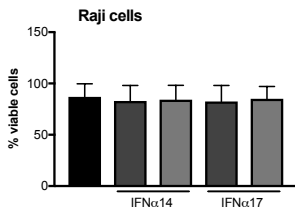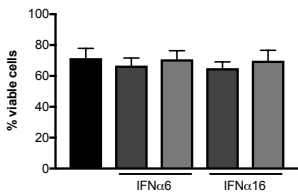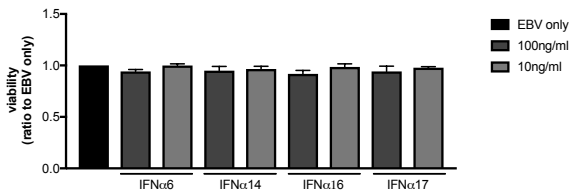



## Figure S3

### STAT1 phosphorylation in Raji cells

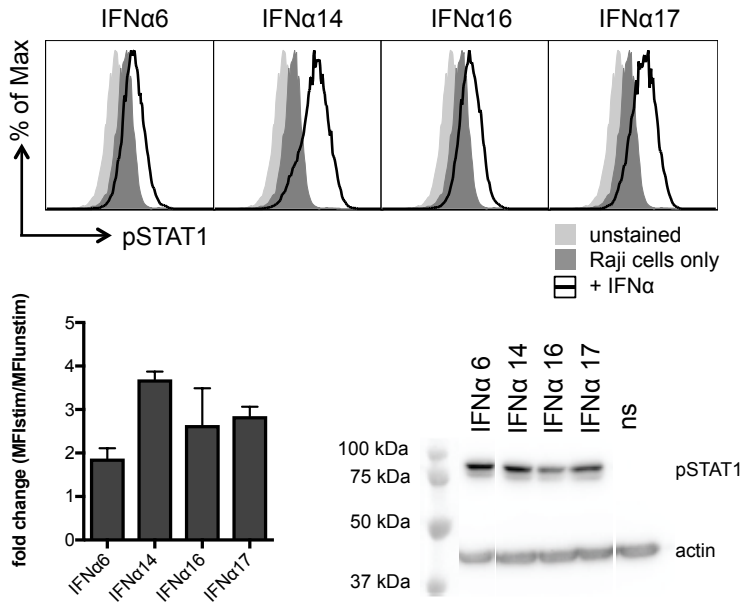



**Figure S5**

**A**

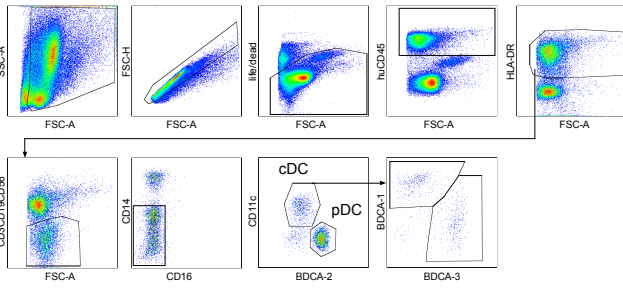

**B**

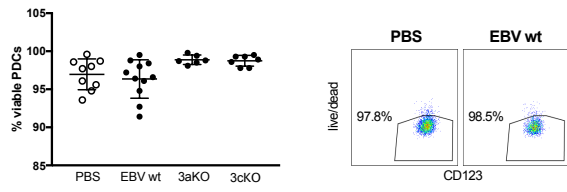

**Figure S6**

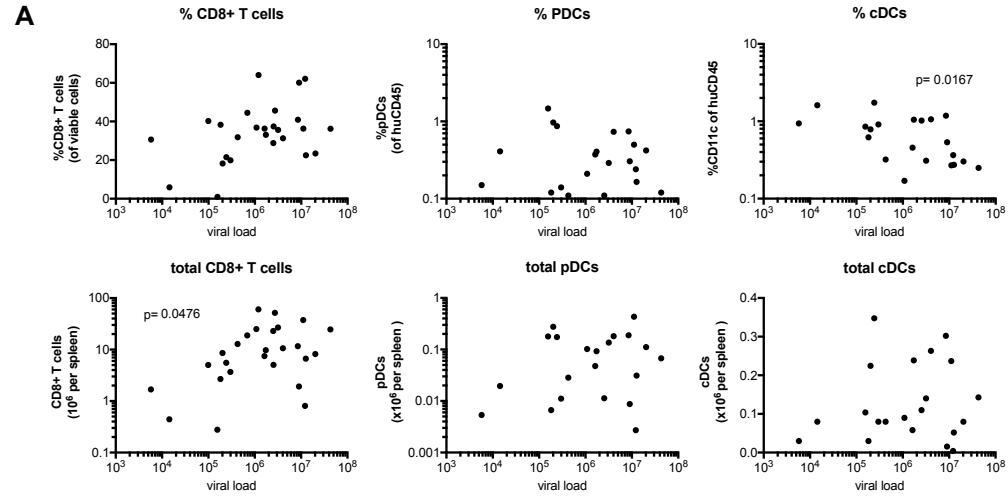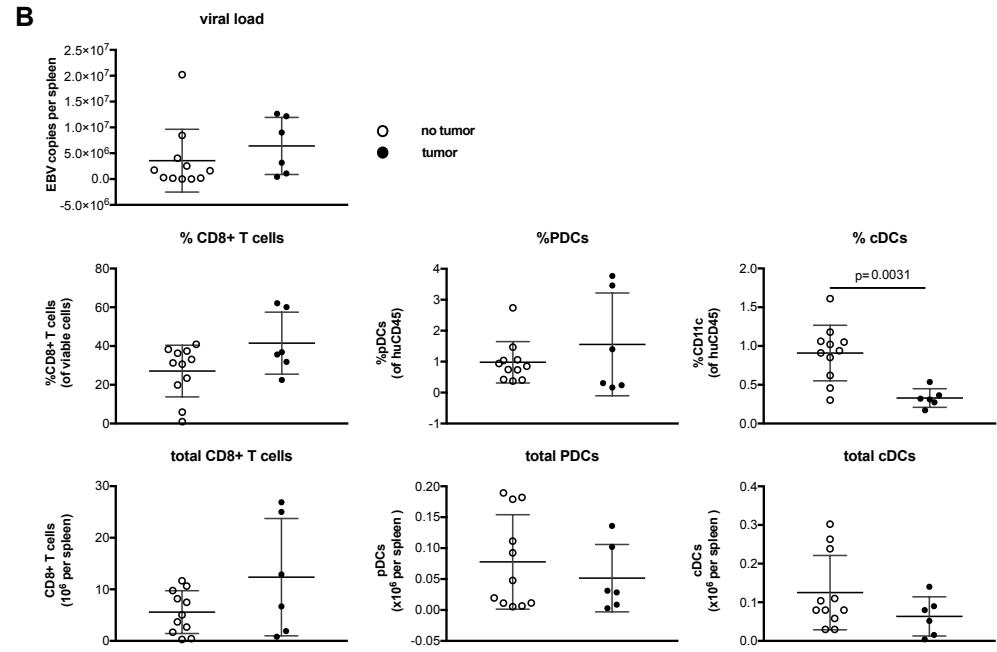

**Figure S7**

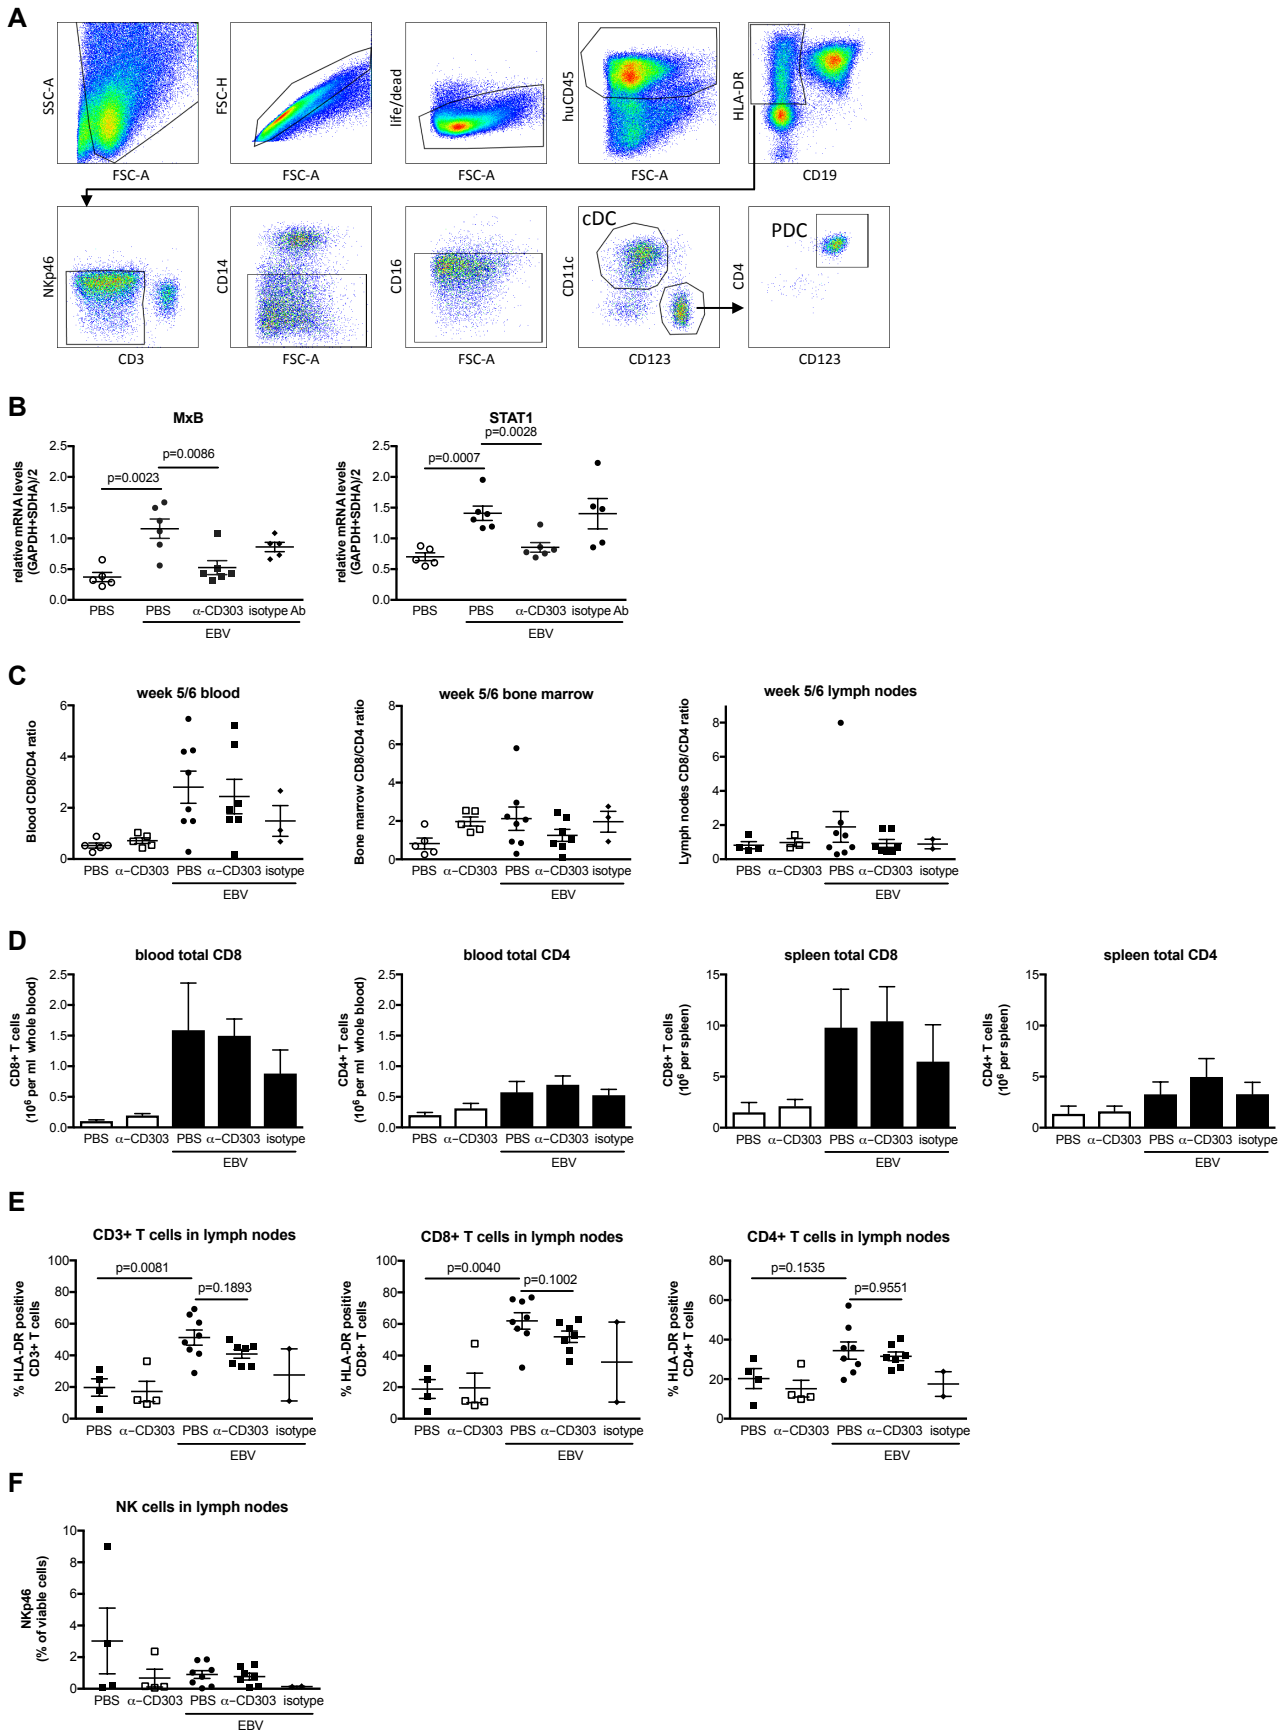

Supplement: ba025536-suppl1.pdf [file ba025536-suppl1.pdf]
